# Supplementary material
Source: PubMed Central journal article supplement (PMC7997689)

A

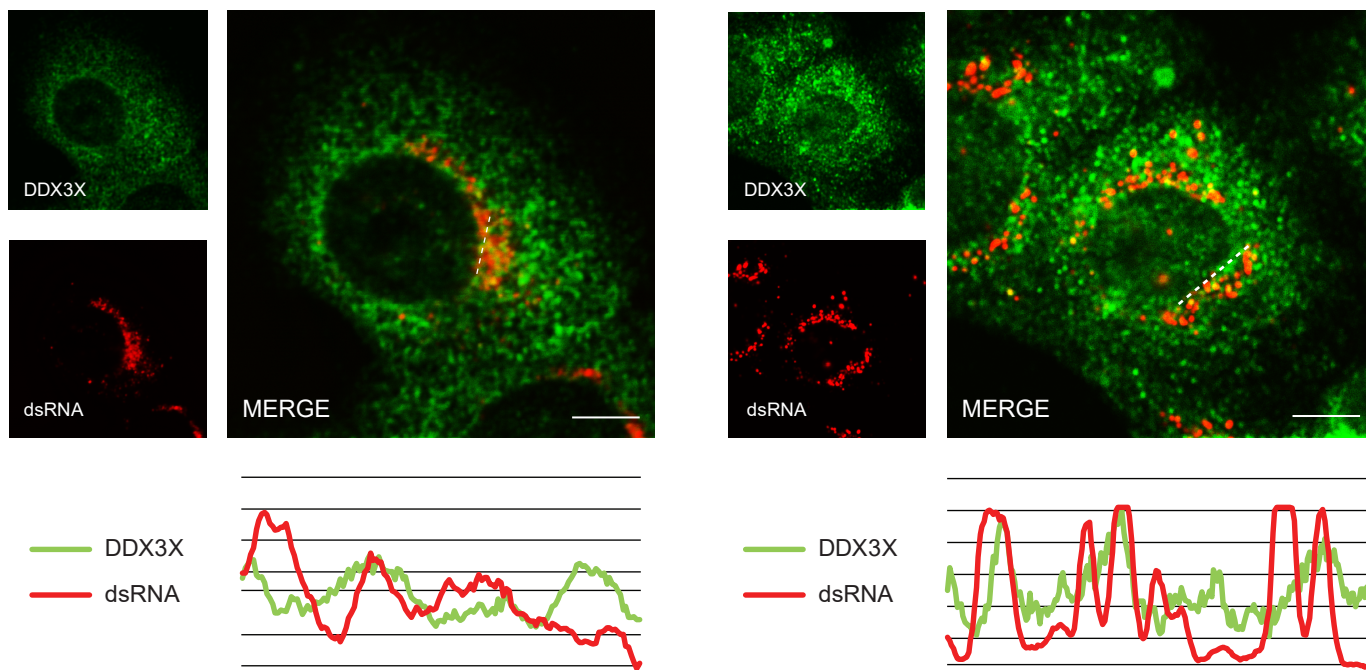

B

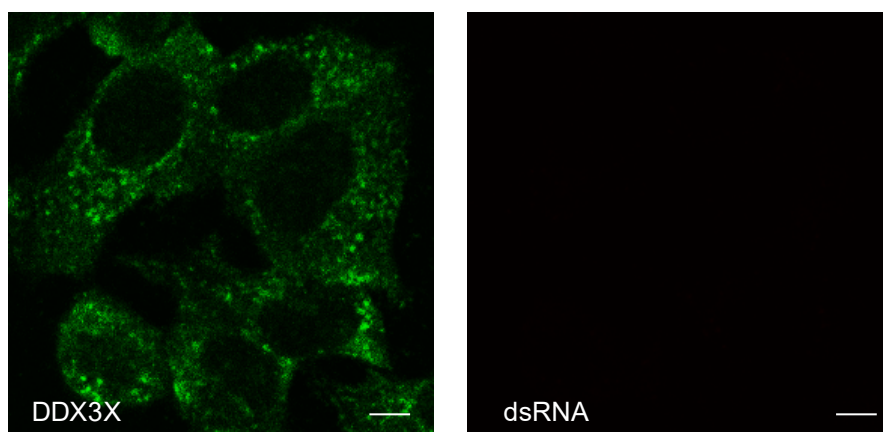

NON-INFECTED VERO E6

Supplement: mmc4.pdf [file mmc4.pdf]
